# Supplementary material
Source: PubMed Central journal article supplement (PMC4302272)
Supplement: NIHMS651836-supplement-5.pdf [file NIHMS651836-supplement-5.pdf]

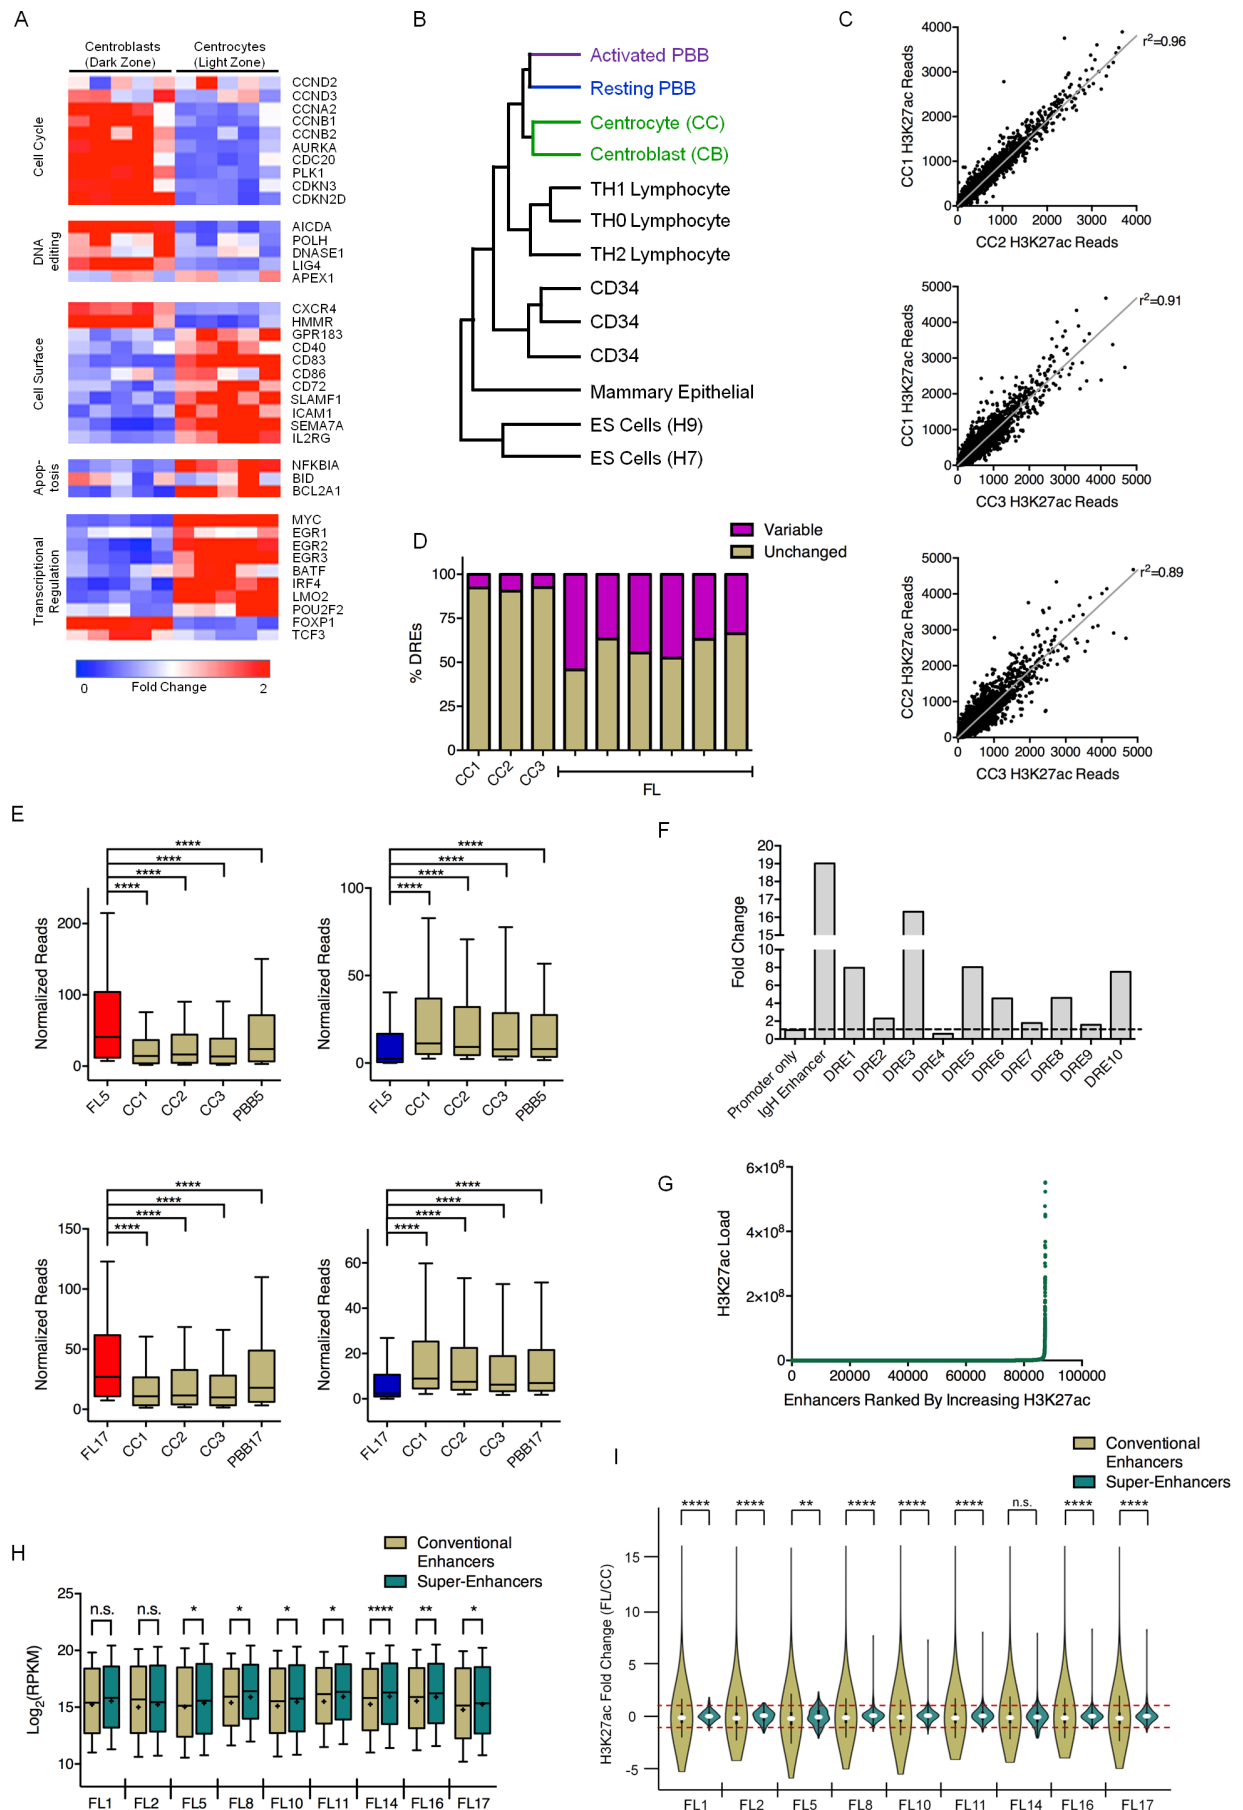

Figure S1

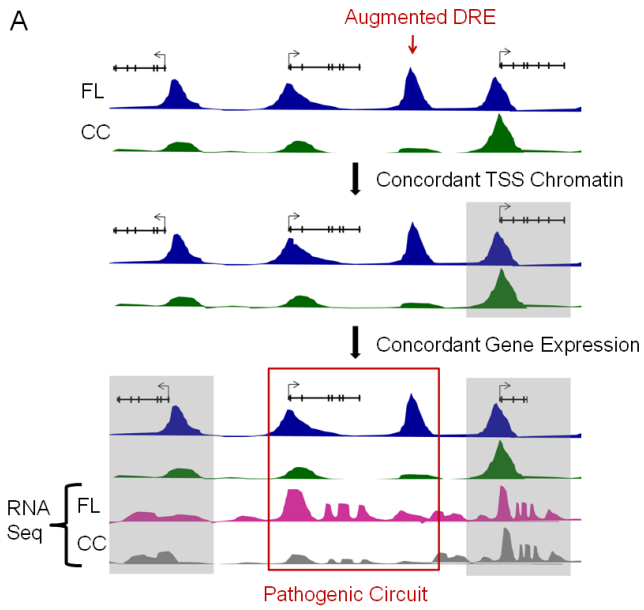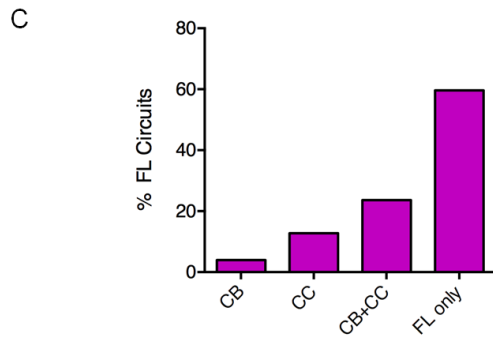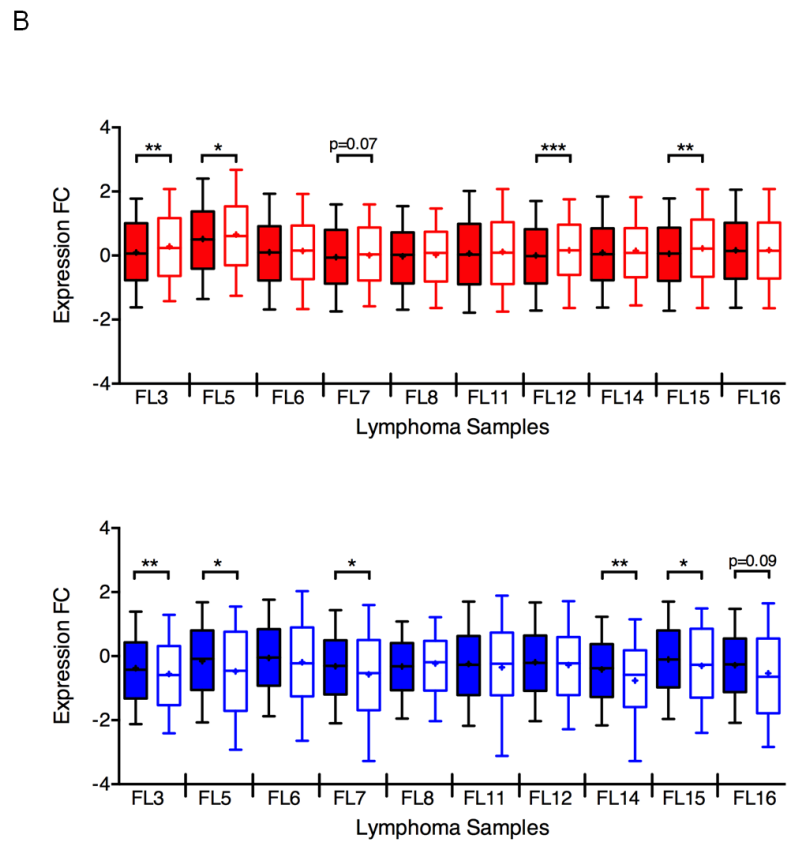

Figure S2

A

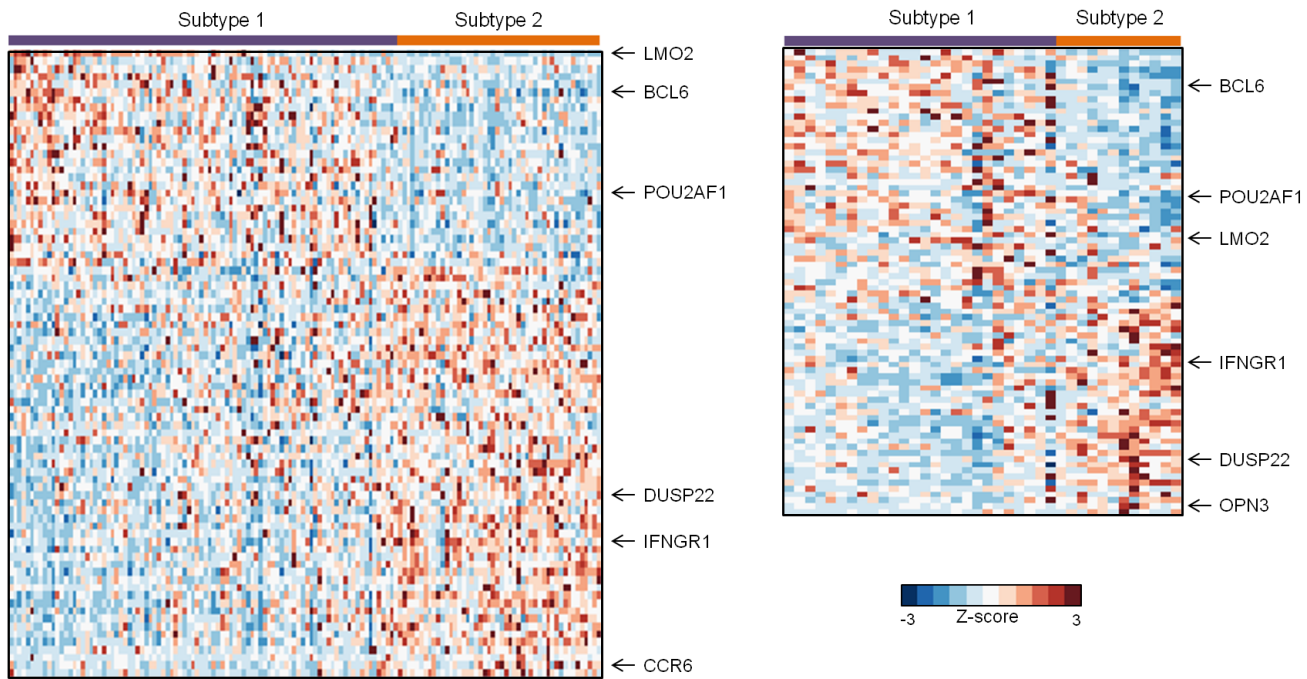

B

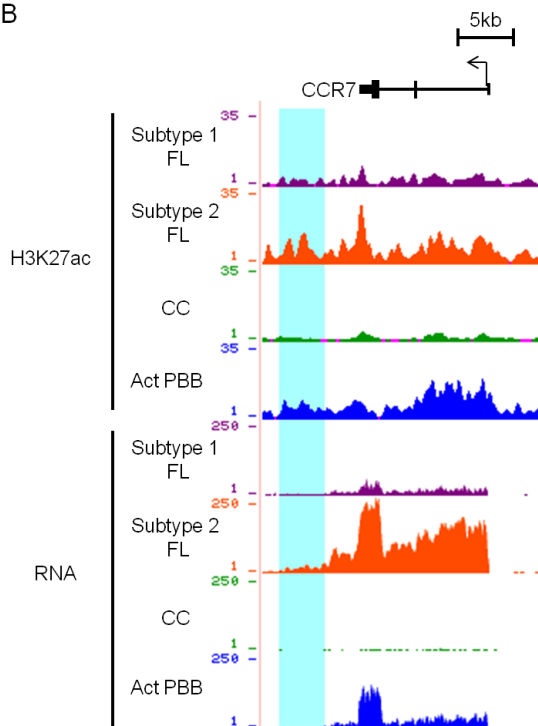

C

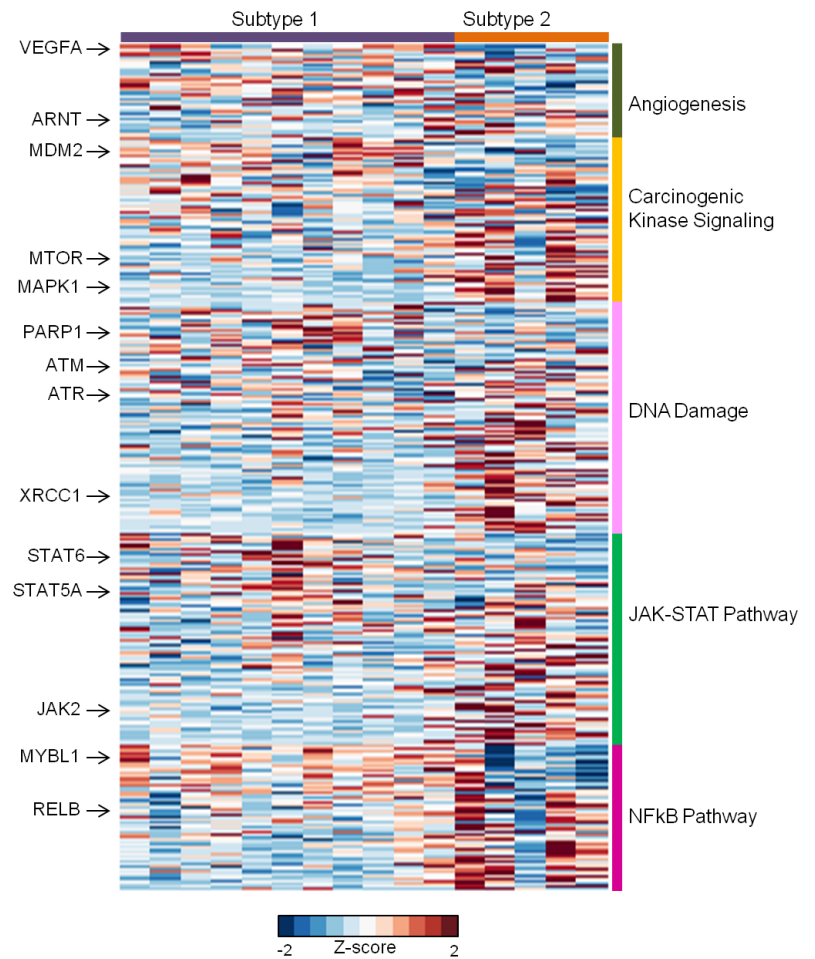

Figure S3

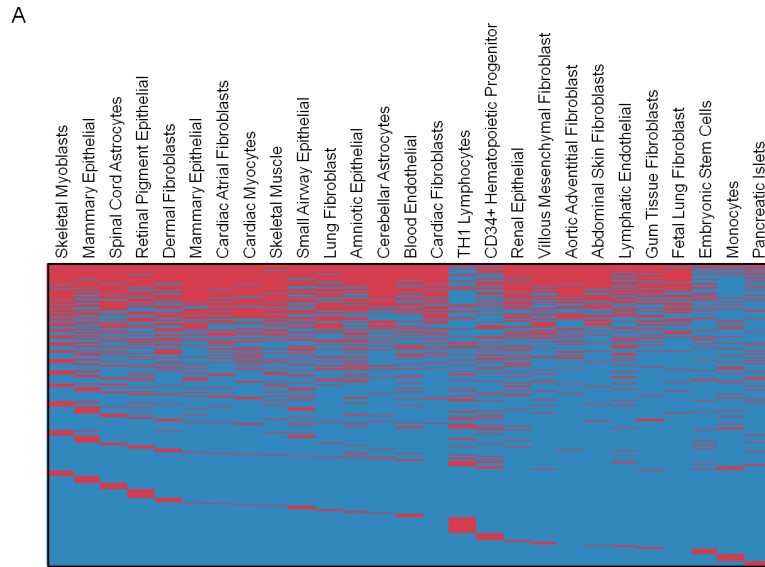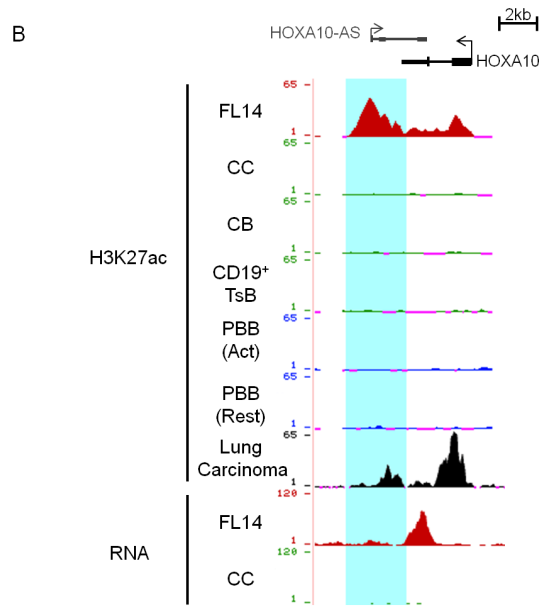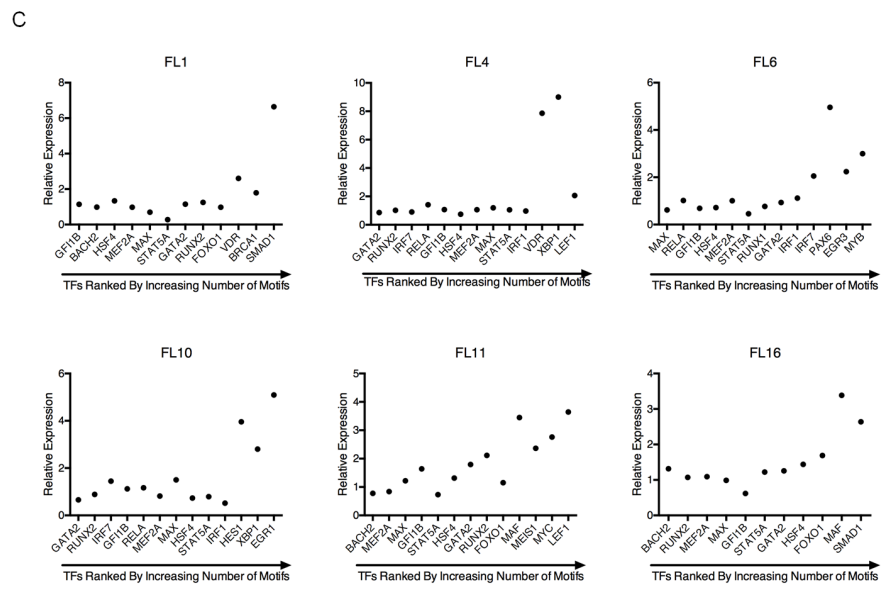

Figure S4

## Supplemental Figure Legends

### Figure S1, related to Figure 1. Identification of Dysregulated Enhancers and Superenhancers in FL.

A) Expression profiles of germinal center B cell populations for a panel of genes previously shown to distinguish CB and CC cells (Victoria et al., 2012). B) Unbiased clustering of open chromatin regions from 10 cell types reveals the close epigenetic relationship between CB and CC (see Experimental Procedures). C) Scatter plots of normalized H3K27ac-Seq data comparing CC samples. D) Bar graph showing percent variable and unchanged DREs when individual CC samples are compared to the average of the other CC samples. For comparison, DRE variability is shown for representative FL samples, calculated compared to the average of all CC samples. Total variable DREs for CC1: 1254, CC2: 1553, CC3: 1230. E) H3K27ac profiles for CC samples and patient-matched PBB. Normalized H3K27ac data show significantly and consistently elevated read densities in augmented (red) and attenuated read densities (blue) in FL5 and FL17 when compared with individual CC samples or to patient-matched PBBs. Statistical significance was determined using Student's *t* test. \*\*\*\* $P < 0.0001$ . F) Luciferase reporter assays for ten variable DREs. DRE and IgH enhancer activities were assayed in lymphoma cell lines and are reported relative to a reporter containing only the SV40 promoter. Results are representative of two independent experiments. G) Rank order of increasing H3K27ac enrichment at enhancer loci in a representative FL sample. H) Mean transcript abundance of the genes associated with conventional and super-enhancers in nine FL samples. Statistical significance (Mann-Whitney test): \* $p \leq 0.05$  \*\*  $p \leq 0.01$ , \*\*\*\*  $p \leq 0.0001$ . I) Violin plots showing H3K27ac fold change of conventional- and super-enhancers for indicated FL samples. Statistical significance ( $\chi^2$  test): \*\*  $p \leq 0.01$ , \*\*\*\*  $p \leq 0.0001$ .

**Figure S2, related to Figure 2. Defining Pathogenic Circuits.** A) Using a pattern-based strategy, we connected variable DREs to genes located within 500 kb that harbor concordant changes in chromatin at their transcription start sites (TSS). To fully elucidate the pathogenic connections, we also required concordant changes in the expression of putative target genes. Gray boxes represent candidate targets for DREs that were excluded from the circuitry due to a lack of concordance for the respective criteria. B) Expression fold change for all genes located within 500kb of DREs augmented (red) or attenuated (blue) in FL based on analysis of microarray data. Genes with concordant changes in TSS chromatin marks are shown as outlined boxes. Square symbols within each box denote means. Statistical significance (unpaired t-test with Welch's correction): \*\*  $p \leq 0.01$ , \*\*\*  $p \leq 0.001$ , \*\*\*\*  $p \leq 0.0001$ . C) Bar graph depicting the proportions of circuits with perturbed activity in FL that exhibit normal activity levels in GC-B subsets or are unique to FL.

**Figure S3, related to Figure 3. FL Subtype 1 and 2 Expression Patterns Differ for Multiple Biological Pathways and in Public Expression Data.** A) Expression profiles for the set of TFs that distinguish subtype 1 from subtype 2 FL. Shown are data from two larger sets (GSE12453-left, GSE16131 - right) of unsorted FL biopsies (Dave et al., 2004; Leich et al., 2009). B) UCSC Genome Browser view of H3K27ac ChIP-seq data showing subtype 2-specific DREs (highlighted in blue) downstream of the *CCR7* gene in FL, CC, and *in vitro* activated PBB samples. RNA-seq data depict the corresponding up-regulation of *CCR7* mRNA in subtype 2 FL relative to subtype 1. C) Expression heatmap for FL samples depicting genes in pathways that showed significant differences in subtypes 1 versus 2, as determined by GSEA (FDR  $q < 0.0001$ , see Methods). Several examples of key pathway genes are highlighted to the left of the heatmap.

**Figure S4, related to Figure 4. FL Pirates REs from Other Cell Lineages.** A) Distribution of 3374 *de novo* REs that overlap regions of open chromatin in at least one of 27 ENCODE non-B cell lineages (coincident, red; non-overlapping, blue) (Bernstein et al., 2012; Thurman et al., 2012). B) UCSC Genome Browser view of H3K27ac ChIP-seq data showing a *de novo* DRE upstream of *HOXA10* that overlaps H3K27ac peaks in lung carcinoma cells (Neph et al., 2012). RNA-seq data depict the corresponding up-regulation of *HOXA10* mRNA in the FL sample relative to CC. C) Relative expression of TFs, ranked by number of corresponding TF motifs within private DREs, in individual FL samples compared to the average of all FL.

## Supplemental Tables

**Table S1, related to Figure 1. Patient Information**

| Patient ID | Diagnosis (Grade) | Age | Sex | $\kappa/\lambda$ Restriction (% CD19 <sup>+</sup> cells) | t(14;18)(q32;q21) Translocation | # CD19 <sup>+</sup> cells purified |
|------------|-------------------|-----|-----|----------------------------------------------------------|---------------------------------|------------------------------------|
| FL1        | FL3A              | 44  | F   | 29/69                                                    |                                 | 26 x 10 <sup>6</sup>               |
| FL 2       | FL 1-2            | 53  | M   | 98/1                                                     | MCR PCR                         | 217 x 10 <sup>6</sup>              |
| FL 3       | FL 1              | 47  | F   | 97/2                                                     |                                 | 62 x 10 <sup>6</sup>               |
| FL 4       | FL 1-2            | 50  | F   | 99/1                                                     |                                 | 35 x 10 <sup>6</sup>               |
| FL 5       | FL 1-2            | 52  | M   | 58/42                                                    | MBR PCR                         | 98 x 10 <sup>6</sup>               |
| FL6        | FL 1-2            | 46  | F   | 93/6                                                     |                                 | 7 x 10 <sup>6</sup>                |
| FL 7       | FL 1-2            | 65  | M   | 71/29                                                    |                                 | 44 x 10 <sup>6</sup>               |
| FL 8       | FL 1              | 53  | F   | 4/95                                                     |                                 | 88 x 10 <sup>6</sup>               |
| FL 9       | FL 1-2            | 35  | F   | 6/76                                                     | MBR PCR                         | 26 x 10 <sup>6</sup>               |
| FL 10      | FL 1-2            | 40  | M   | 7/92                                                     | MBR PCR                         | 19 x 10 <sup>6</sup>               |
| FL 11      | FL 1-2            | 78  | M   | 53/35                                                    | MBR PCR                         | 91 x 10 <sup>6</sup>               |
| FL 12      | FL 2              | 57  | F   | CD19 <sup>+</sup> , $\kappa/\lambda$ lost                | MBR PCR                         | 114 x 10 <sup>6</sup>              |
| FL 13      | FL 1-2            | 69  | F   | 7/87                                                     | MBR PCR                         | 159 x 10 <sup>6</sup>              |
| FL 14      | FL 1-2            | 63  | F   | 92/7                                                     | MBR PCR                         | 46 x 10 <sup>6</sup>               |
| FL15       | FL 1-2            | 50  | F   | 90/1                                                     | MBR PCR                         | 11 x 10 <sup>6</sup>               |
| FL 16      | FL 1-2            | 63  | F   | 98/2                                                     | FISH/MCR PCR                    | 152 x 10 <sup>6</sup>              |
| FL 17      | FL 1-2            | 61  | M   | 15/84                                                    |                                 | 4 x 10 <sup>6</sup>                |
| FL18       | FL3A              | 60  | M   | 97/2                                                     | FISH                            | 7 x 10 <sup>6</sup>                |

MBR = major breakpoint region

MCR = minor cluster region



**Table S2, related to Figure 1.** (Provided in .xls format)

Mutations in FL samples.

**Table S3, related to Figure 1.** (Provided in .xls format)

Super-enhancer genomic locations and their nearest neighbor genes.

**Table S4, related to Figure 2.** (Provided in .xls format)

Circuits tab: Genomic locations of variable DREs are listed with genes that show concordant chromatin changes at the TSS. DRE coordinates tab: The genomic locations of all numbered DRE shown in Figures 4, 5, 7 and S1. Recurrent DRE tab: The genomic locations of recurrent DREs ( $\geq 13$  FL) and their putative target genes (located within 100 kb).

**Table S5, related to Figure 3. Clinical Characteristics**

| <b>Clinical Variable</b>                           | <b>Subtype 1</b> | <b>Subtype 2</b> | <b>Total</b> | <b>% of patients</b> | <b>Subtype 1 vs. 2, p-value</b> |
|----------------------------------------------------|------------------|------------------|--------------|----------------------|---------------------------------|
| <b><i>Age (Yr)</i></b>                             |                  |                  |              |                      |                                 |
| ≤60                                                | 6                | 5                | 11           | 68.75                | 0.5879                          |
| >60                                                | 4                | 1                | 5            | 31.25                |                                 |
| <b><i>Sex</i></b>                                  |                  |                  |              |                      |                                 |
| Male (M)                                           | 2                | 3                | 5            | 31.25                | 0.2995                          |
| Female (F)                                         | 8                | 3                | 11           | 68.75                |                                 |
| <b><i>Previously treated for NHL</i></b>           |                  |                  |              |                      |                                 |
| Yes                                                | 2                | 3                | 5            | 31.25                | 0.2995                          |
| No                                                 | 8                | 3                | 11           | 68.75                |                                 |
| <b><i>Age, Sex</i></b>                             |                  |                  |              |                      |                                 |
| ≤60, M                                             | 1                | 2                | 3            | 18.75                | 0.3882                          |
| ≤60, F                                             | 5                | 3                | 8            | 50.00                |                                 |
| >60, M                                             | 1                | 1                | 2            | 12.50                |                                 |
| >60, F                                             | 3                | 0                | 3            | 18.75                |                                 |
| <b><i>Age, Previously treated for NHL</i></b>      |                  |                  |              |                      |                                 |
| ≤60, Yes                                           | 1                | 2                | 3            | 18.75                | 0.3882                          |
| ≤60, No                                            | 5                | 3                | 8            | 50.00                |                                 |
| >60, Yes                                           | 1                | 1                | 2            | 12.50                |                                 |
| >60, No                                            | 3                | 0                | 3            | 18.75                |                                 |
| <b><i>Sex, Previously treated for NHL</i></b>      |                  |                  |              |                      |                                 |
| M, Yes                                             | 1                | 2                | 3            | 18.75                | 0.5218                          |
| M, No                                              | 1                | 1                | 2            | 12.50                |                                 |
| F, Yes                                             | 1                | 1                | 2            | 12.50                |                                 |
| F, No                                              | 7                | 2                | 9            | 56.25                |                                 |
| <b><i>Sex, Age, Previously treated for NHL</i></b> |                  |                  |              |                      |                                 |
| M, ≤60, prev Rx NHL                                | 0                | 1                | 1            | 6.25                 | >0.99                           |
| M, ≤60, not prev Rx NHL                            | 1                | 1                | 2            | 12.50                |                                 |
| M, >60, prev Rx NHL                                | 1                | 1                | 2            | 12.50                |                                 |
| M, >60, not prev Rx NHL                            | 0                | 0                | 0            | 0                    |                                 |
| F, ≤60, prev Rx NHL                                | 1                | 1                | 2            | 12.50                |                                 |
| F, ≤60, not prev Rx NHL                            | 4                | 2                | 6            | 37.50                |                                 |
| F, >60, prev Rx NHL                                | 0                | 0                | 0            | 0                    |                                 |
| F, >60, not prev Rx NHL                            | 3                | 0                | 3            | 18.75                |                                 |

**Table S6, related to Figures 4 and 5.** (Provided in .xls format)

Expression values for TFs with motifs located in variable DREs.

**Table S7, related to Figure 6. Sanger Confirmation of SNVs**

| <b>SNV position</b> | <b>Sample</b> | <b>Reference Allele</b> | <b>SNV</b> | <b>Sanger Results Tumor</b> | <b>Sanger Results PBMC</b> | <b>Variant confirmed</b> |
|---------------------|---------------|-------------------------|------------|-----------------------------|----------------------------|--------------------------|
| chr16:86028704      | FL11          | C                       | T          | C/T                         | T                          | Y                        |
| chr18:60767176      | FL1           | C                       | T          | C/T                         | C                          | Y                        |
| chr18:60773649      | FL1           | T                       | G          | T/G                         | T                          | Y                        |
| chr1:9690142        | FL5           | G                       | C          | G/C                         |                            | Y                        |
| chr1:16161310       | FL2           | G                       | A          | G/A                         |                            | Y                        |
| chr1:146556381      | FL14          | T                       | G          | T                           |                            | N                        |
| chr4:774746         | FL10          | A                       | C          | A/C                         |                            | Y                        |
| chr5:43008282       | FL2           | A                       | G          | A/G                         |                            | Y                        |
| chr5:43018447       | FL5           | C                       | T          | C/T                         |                            | Y                        |
| chr5:132441234      | FL2           | A                       | G          | G/A                         |                            | Y                        |
| chr7:139875528      | FL1           | G                       | C          | G                           |                            | N                        |
| chr11:65190196      | FL1           | A                       | G          | A/G                         |                            | Y                        |
| chr11:65192186      | FL10          | G                       | A          | G/A                         |                            | Y                        |
| chr12:90103524      | FL11          | G                       | A          | G/A                         |                            | Y                        |
| chr17:1104507       | FL16          | C                       | T          | C/T                         |                            | Y                        |
| chr18:60768373      | FL1           | G                       | C          | G                           |                            | N                        |
| chr18:60768727      | FL1           | G                       | A          | G                           |                            | N                        |
| chr21:26940817      | FL10          | T                       | A          | T/A                         |                            | Y                        |
| chr21:26944186      | FL10          | G                       | C          | G/C                         |                            | Y                        |
| chr3:33429969       | FL1           | T                       | A          | T/A                         | T/A                        | Y                        |
| chr5:42994920       | FL14          | C                       | G          | C/G                         | C/G                        | Y                        |
| chr5:42994921       | FL14          | G                       | T          | G/T                         | G/T                        | Y                        |
| chr5:43008176       | FL14          | T                       | C          | T/C                         | T/C                        | Y                        |
| chr7:28194673       | FL14          | G                       | A          | A/G                         | A/G                        | Y                        |
| chr7:130615173      | FL14          | T                       | C          | T/C                         | T/C                        | Y                        |
| chr11:65185941      | FL14          | G                       | A          | G/A                         | G/A                        | Y                        |
| chr11:65192335      | FL14          | G                       | A          | G/A                         | G/A                        | Y                        |
| chr22:22511585      | FL14          | G                       | C          | G/C                         | G/C                        | Y                        |

## **Supplemental Experimental Procedures**

**Patient Samples.** De-identified excisional lymph node biopsies were obtained from 18 patients prior to therapy (Siteman Cancer Center, WUSM) under an IRB-approved protocol with patients providing informed consent. When possible, PB samples were collected prior to treatment. All biopsies were reviewed by hematopathologists and diagnosed as FL based on morphology, immunohistochemistry, and flow cytometry. Tonsils were obtained from elective surgery (Children's Hospital, WUSM, St. Louis) in accordance with the WUSM Human Studies Committee Board. PB also was drawn from healthy volunteers by Volunteers for Health at WUSM with IRB approval.

**Lymphoma Cell Lines.** OCI-Ly7 (germinal center B cell-like diffuse large B cell lymphoma (GCB-DLBCL) and RL (DLBCL) were obtained from DSMZ (Braunschweig, Germany). GM12878 (lymphoblastoid B cell) was obtained from Coriell Institute for Medical Research (Camden, NJ, USA). Raji (Burkett's B cell lymphoma) was kindly provided by T. Fehniger. Cell lines were maintained in RPMI media supplemented with 10% fetal calf serum, 5 mM L-glutamine and 5 mM penicillin–streptomycin at 37°C with 5% carbon dioxide.

**ChIP Assays.** Cells were formaldehyde cross-linked (1% final concentration) for 10 minutes at room temperature in RPMI with 10% FBS. Crosslinking was quenched with the addition of 1M glycine (125 mM final concentration) for 5 minutes at room temperature. Cells were washed with cold PBS and lysed in an SDS buffer (1% SDS, 10 mM EDTA, 50 mM Tris [pH 8.0], dH<sub>2</sub>O) with EDTA-free protease inhibitors (Roche, France) for 20 minutes on ice. Chromatin was fragmented using a Bioruptor (Diagenode, Denville, NJ, USA) to an average size of less

than 300 bp. Sonicated lysates were subjected to immunoprecipitation overnight at 4°C with acetylated H3 antibody (Millipore, Billerica, MA, USA), acetylated H3K27 antibody (Abcam, Cambridge, MA, USA), monomethylated H3K4 antibody (Abcam) or isotype control antibody (Santa Cruz Biotechnologies, Santa Cruz, CA, USA) conjugated to Dynabeads (Invitrogen, USA) coated with Protein-A. Samples were washed for 3 minutes at 4°C with the following buffers: low-salt buffer (0.1% SDS, 1% Triton X-100, 2 mM EDTA, 20 mM Tris [pH 8.0], 150 mM NaCl, dH<sub>2</sub>O), high-salt buffer (0.1% SDS, 1% Triton X-100, 2 mM EDTA, 20 mM Tris [pH 8.0], 500 mM NaCl, dH<sub>2</sub>O), LiCl buffer (0.25 M LiCl, 1% NP-40, 1% deoxycholate, 1 mM EDTA, 10 mM Tris [pH 8.0], dH<sub>2</sub>O), and 1X Tris-EDTA buffer, and eluted with an SDS buffer (1% SDS, 0.1 M NaHCO<sub>3</sub>, dH<sub>2</sub>O). Following elution, cross-links were reversed overnight with 5 M NaCl at 65°C and immunoprecipitated DNA was isolated using spin purification columns (Qiagen, Valencia, CA, USA) as per manufacturer's instructions. At least 3 ng of ChIP, or input DNA was used for indexed library preparation. Samples were pooled and subjected to 42 bp single-end sequencing according to the manufacturer's protocol (Illumina HiSeq2000, San Diego, CA).

**FAIRE.** Preparation of samples for FAIRE was carried out essentially as described (Giresi and Lieb, 2009). Aliquots of five million cells were cross-linked as described for ChIP-seq. Cross-linked chromatin was lysed for 10 minutes sequentially in L1 buffer (50mM Hepes KOH pH 7.5, 140mM NaCl, 1mM EDTA pH 8.0, 10% glycerol, 5% NP40 and 0.25% Triton X-100) followed by L2 buffer (200mM NaCl, 1mM EDTA pH 8.0, 0.5mM EGTA pH 8.0, 1M and Tris pH 8.0). The pellets were resuspended in 300 µl of buffer L3 (1mM EDTA pH 8.0, 0.5mM EGTA pH 8.0, 1M Tris pH 8.0, 100mM NaCl, 0.1% Na-deoxycholate and 5mg/ml N-lauroyl sarcosine)



with EDTA-free protease inhibitors (Roche, France) and subjected to sonication using a Bioruptor (Diagenode) to an average size of 500bp. The soluble DNA fraction was isolated by performing two consecutive phenol:chloroform:isoamylalcohol (25:24:1, pH 8) extractions followed by a chloroform-isoamyl alcohol (24:1) extraction. Precipitated DNA was resuspended in 10mM Tris-HCl (pH 7.4) and incubated with 10 µg of RNase A for 1hr. Samples were then purified using spin columns (Qiagen).

**Epigenome Analysis Pipeline.** Sequencing tags from FAIRE- and ChIP-Seq were aligned to the reference genome (build GRCh37/hg19) with Novoalign (Hatem et al., 2013). MACS (Feng et al., 2012) was used to identify FAIRE, H3ac, H3K27ac, or H3K4me1 peaks by comparison of matched treatment to input samples using the following changes to the default settings: --nomodel --shiftsize=150 (ChIP-seq), --nomodel --shiftsize=50 (FAIRE-seq). Overlapping peaks for all chromatin marks were merged to generate a consolidated list of putative regulatory elements. Sequencing tags in 200 bp bins spanning these merged regions were pulled from wig files and reads per million (RPM) aligned reads calculated. RPM reads were then quantile normalized. Average values for control CC samples were used as the denominators to determine fold change. REs were designated as variable if their FAIRE, H3ac or H3K27ac change were two fold increased or decreased. Due to limiting cell numbers, some of the 18 FL samples did not have all assays performed; the following indicates the total FL samples with data available for each assay type. Expression microarray: 16, RNA-Seq: 10, FAIRE: 12, H3K9ac: 12, H3K27ac: 9.

**Open Chromatin Clustering.** DNase I-hypersensitive site (DHS) data for mammary epithelial (HMEC), embryonic stem cells (H7 and H9), T lymphocytes (TH1, TH2, TH0) and

hematopoietic progenitor (CD34<sup>+</sup>) cells (Bernstein et al., 2012; Thurman et al., 2012) were downloaded from NCBI Gene Expression Omnibus (GEO, accessions GSE29692, GSE32970, and GSE18927 and subjected to MACS analysis using the previously defined FAIRE parameters. We merged overlapping peaks across all cell types using BEDTools (Quinlan and Hall, 2010) and calculated the Euclidean distance between two cell types using vectors of binary values. For each element, a cell type received a “1” if it contained a peak enveloped by the merged region or “0” otherwise. Pairwise Euclidean distances were calculated and the cell types clustered using *hclust* (nearest-neighbor algorithm) and *dendrogram* functions in the R statistical package (<http://www.r-project.org>).

**BCL2-IgH Translocations.** BCL2-IgH rearrangements were detected in FL-derived genomic DNA by Taq-man real-time PCR. Reactions contained primers and fluorescently labeled probes specific to the major breakpoint region (MBR) or minor cluster region (MCR) of the t(14;18)(q32;21) translocation. A control primer set (EEFIG) was designed to assess DNA quality.

#### **t(14;18)(q32;q21)Translocation Primers**

| <b>Primer</b>            | <b>Sequence</b>            | <b>Reference</b>        |
|--------------------------|----------------------------|-------------------------|
| MBR primer               | TTAGAGAGTTGCTTTACGTGGCC    | (Weinberg et al., 2007) |
| MBR probe <sup>^</sup>   | TTTCAACACAGACCCACCCAGAGCC  |                         |
| MCR primer               | CCTGGCTTCCTTCCCTCTGT       | (Weinberg et al., 2007) |
| MCR probe <sup>^</sup>   | TCTCTGGGGAGGAGTGGAAAGGAAGG |                         |
| JH                       | GACCTGAGGAGACGGTGACC       |                         |
| EEFIG Fwd                | TTCAGTTTGCAAAGCTTCAGG      | NA                      |
| EEFIG Rev                | TACTGCATGCCAGACCCTGT       |                         |
| EEFIG Probe <sup>^</sup> | TCCTCTTCTGGTCTTTGCAAAC     |                         |

<sup>^</sup> Fluorescent internal probes labeled at the 5' end with the reporter dye FAM and at the 3' end with the quencher dye TAMRA

**Assigning Commandeered Elements to Other Cell Types.** REs present in at least one FL sample but not overlapping with normal B cell sample sets or with GM12878 ENCODE data

were assigned as *de novo*. DNase I-hypersensitive site (DHS) data for non-B cell types (Bernstein et al., 2012; Thurman et al., 2012) were downloaded from the UCSC Browser and overlapping peaks were merged using BEDTools (Quinlan and Hall, 2010). Using a binary vector, a cell type received a “1” if an element contained a peak enveloped by the merged region or “0” otherwise. The consolidated list of DHS was intersected with *de novo* REs. Normal cell types were separated from cancerous and the resultant binary matrices were used to generate heatmaps in R (<http://www.r-project.org>).

**Gene Ontology and Pathway Analysis.** Gene ontology (GO) annotation and Kyoto Encyclopedia of Genes and Genomes (KEGG) pathway analyses were performed using DAVID (Huang et al., 2009). Lists of up- or down-regulated genes (2-fold) located  $\pm 500$  kb of *de novo* or attenuated REs, respectively, were generated by comparing FLs with average CC expression array data. Gene Set Enrichment Analysis (GSEA) using gene sets available from MSigDB (<http://www.broadinstitute.org/gsea/msigdb/index.jsp>) identified significantly enriched biological pathways (Subramanian et al., 2005).

**Enriched Motif Analysis:** DRE *de novo* motifs were identified using MEME version 4.9.0 in the MEME suite (Bailey et al., 2009) or RSAT (Thomas-Chollier et al., 2012). After removing repeat regions with RepeatMasker (Tempel, 2012), DNA sequences from the center of DRE FAIRE peaks were subjected to motif analysis. Sequence motifs enriched in promoters of up- or down-regulated pathway genes were identified using g:Profiler (Reimand et al., 2011). Motifs were analyzed by TOMTOM in the MEME suite (Bailey et al., 2009) for comparison against

Human and Mouse (Jolma et al., 2013) and JASPAR (Portales-Casamar et al., 2010) databases of known transcription factor motifs.

**Cloning for Luciferase Assays.** DREs were amplified and, with the exception of DRE8, inserted into Bam HI and Sal I sites downstream of the luciferase coding sequence in the SV40 promoter-driven pGL3 plasmid (Promega). DRE8 was blunted into the enhancer position of pGL3 plasmid. Mutations corresponding to the relevant SNVs were introduced into the luciferase vectors using Q5 site-directed mutagenesis (New England Biolabs, Ipswich, MA, USA).

#### **Luciferase assay cloning primers**

| <b>Primer Name</b> | <b>Sequences</b>                   |
|--------------------|------------------------------------|
| IgH Enhancer Fwd   | GGATCCCCGGCCCCGATGCGGGACTGCG       |
| IgH Enhancer Rev   | GACGGCCACTCTATCAGAATATC            |
| DRE1 Fwd           | GGATCCCCCGGTCTTAACTGTTTCTATATGT    |
| DRE1 Rev           | GTCGACTCCGCAAAGCTCAGTCATGT         |
| DRE2 Fwd           | GGATCCCCCCCCGTTCCCTGTGAGTTA        |
| DRE2 Rev           | GTCGACCATGGAGACCTCACCGCAG          |
| DRE3 Fwd           | GGATCCTGTCTTCCTCTTCCCTGCTT         |
| DRE3 Rev           | GTCGACTACCAACCTCCCTGCAAAGT         |
| DRE4 Fwd           | GGATCCTCTCCACCCTGTCTTCCCAT         |
| DRE4 Rev           | GTCGACCAGCAGTGAGTTCCTCAGGG         |
| DRE5 Fwd           | GGATCCCTGCCATCCTCTCTTGCCTC         |
| DRE5 Rev           | GTCGACGGGAGTCCCATGCCATCTTC         |
| DRE6 Fwd           | GGATCCAGGATCTATCTCATCGGGGCA        |
| DRE6 Rev           | GTCGACCCAACACATGCTCGACCTTT         |
| DRE7 Fwd           | GGATCCTAGCCAGAGCAGACCAGCTA         |
| DRE7 Rev           | GTCGACCCCCAAGAGGGCTGTGAAAT         |
| DRE8 Fwd           | GGATCCTTCCCCAGGTCAAGTCCTCT         |
| DRE8 Rev           | GTCGACTGTGGGATTGTGTACGCATGT        |
| DRE9 Fwd           | GGATCCTCTTCCATGCCAAGCTCAG          |
| DRE9 Rev           | GTCGACTCCCTGGACTGAAGTCCTCT         |
| DRE10 Fwd          | GGATCCGGCTTGACTGCTGACTCCTT         |
| DRE10 Rev          | GACTTATTCATGGCATGGGCAGC            |
| DRE15 Fwd          | CCCCGGATCCTGTGAAGCAGAGTAAAGACTGAGA |
| DRE15 Rev          | CCCCGTCGACCCTGGGCTTTGAATTTAGGCAG   |
| DRE16 Fwd          | CCCCGGATCCCTTTTCTCCACACCCACACG     |
| DRE16 Rev          | CCCCGTCGACGCCTTAATCTGTCCTCGCCA     |
| DRE17 Fwd          | CCCAGGATCCGCACAGCGGAACCAGGTA       |
| DRE17 Rev          | CCCCGTCGACCATGAATGAGAAGCGAGACCC    |

**Enrichment of SNPs in variable DREs.** GWAS SNPs associated with neonatal diseases, immune disease, nervous system disease, body measurements, non-B cell cancers, inflammatory disease, cardiovascular disease, and behavior and addiction were downloaded from NCBI's dbSNPs database ([http://www.ncbi.nlm.nih.gov/projects/gapplusprev/sgap\\_plus.htm](http://www.ncbi.nlm.nih.gov/projects/gapplusprev/sgap_plus.htm)) in April 2014. SNPs not located on the main chromosome contigs, SNPs without a dbSNP ID and SNP records that contained multiple SNPs associated with a particular trait were excluded from analysis. Enrichment of trait-associated SNPs was calculated as the proportion of SNPs associated with a given trait in variable DREs divided by the proportion of all SNPs in variable DREs ( $p$ ). Significance of the enrichment was calculated as previously described (Maurano et al., 2012) using the binomial equation with  $x$  being equal to the number of SNPs associated with a given trait,  $n$  equal to the total number of SNPs associated with that trait and  $p$  to the previously calculated value.

### **Oligonucleotide Precipitation Assays**

Biotinylated complementary oligonucleotides were annealed and incubated with whole cell lysates from 293T cells transfected with 5  $\mu$ g of CMV promoter driven TCF3, IKZF1, or SP1 expression plasmid using TransIT (Mirus, Madison, WI, USA) transfection reagent.

#### **OPA oligonucleotides**

| <b>Name</b>      | <b>Sequences</b>               |
|------------------|--------------------------------|
| Ikaros reference | TGACGCTGGATTCTCCCTGCTAGTGATGCA |
| Ikaros variant   | TGACGCTGGATTCTCTCTGCTAGTGATGCA |
| SP1 reference    | CAGGAGGGAGCGGCGGGGGAGGAGGGGGTG |
| SP1 variant      | CAGGAGGGAGCGGCGAGGGAGGAGGGGGTG |
| TCF3 reference   | AGATCGAGGTGCCAGCTGCTAAGAGGGGTC |
| TCF3 variant     | AGATCGAGGTGCCAGTTGCTAAGAGGGGTC |

**Analysis of knockdown experiments.** Cells transfected with control or SPIB shRNA were purified by CD4 selection 48 hours post transfection. The abundance of mRNA transcripts was assessed by quantitative PCR. To assess the impact on DRE activity, purified cells were subjected to H3K27ac ChIP assay and quantitative PCR.

### Realtime oligonucleotides

| Name              | Assay  | Sequences                  | Source                       |
|-------------------|--------|----------------------------|------------------------------|
| CABLES1 sense     | RT-PCR | GGACGGAGGAAGACAATCAA       | (Park et al., 2007)          |
| CABLES1 antisense | RT-PCR | CAGGTTACGGAAGCTGGGAGA      |                              |
| COL4A2 sense      | RT-PCR | GAAGTTTGATGTGCCGTGTGG      | (Fuchshofer et al., 2007)    |
| COL4A2 antisense  | RT-PCR | CTTTACGTCCCTGCAGCCC3       |                              |
| DUSP10 sense      | RT-PCR | AAGAGGCTTTTGAGTTCATTGAG    | (Leyva-Illades et al., 2010) |
| DUSP10 antisense  | RT-PCR | CAAGTAAGCGATGACGATGG       |                              |
| GAPDH sense       | RT-PCR | ATGGGGAAGGTGAAGGTCTG       |                              |
| GAPDH antisense   | RT-PCR | GGGTCATTGATGGCAACAATATC    |                              |
| RAB20 sense       | RT-PCR | CCCAAGGGCACCTAAGCA         | (Wang et al., 2005)          |
| RAB20 antisense   | RT-PCR | CCAGCATCTTGTAAGTGGAGGATCTT |                              |
| SPIB sense        | RT-PCR | GGGCCACACTTCAGCTGTCT       | (Talby et al., 2006)         |
| SPIB antisense    | RT-PCR | CAGTCCAGTCCCACAGGGAG       |                              |
| TET2 sense        | RT-PCR | TTCGCAGAAGCAGCAGTGAAGAG    | (Liu et al., 2013)           |
| TET2 antisense    | RT-PCR | AGCCAGAGACAGCGGGATTTCCTT   |                              |
| TMEM241 sense     | RT-PCR | GGTCTCTGGTCGGCCTCACCTT     | (Hansen et al., 2012)        |
| TMEM241 antisense | RT-PCR | TGAGCGTCTGCCACCCTTGGA      |                              |
| DRE11 sense       | ChIP   | CCCAGGCAGTGATGGCTTTA       |                              |
| DRE11 antisense   | ChIP   | AGGCTCGGCACTCCTATGTA       |                              |
| DRE12 sense       | ChIP   | GACCAGTTCTGTGGGTAGGG       |                              |
| DRE12 antisense   | ChIP   | CAGTGGATTGTCCAAGCGTC       |                              |
| DRE13 sense       | ChIP   | GCCTTACCTGGACCCTTACC       |                              |
| DRE13 antisense   | ChIP   | GGAACCTCGGATGGCACTTT       |                              |
| DRE14 sense       | ChIP   | GACTTCTGGGAGGAACAGCC       |                              |
| DRE14 antisense   | ChIP   | GTGGTTGCACAGGTAGTGGA       |                              |

**Statistical Analyses.** Comparison of expression of all genes near variable DREs or genes with concordant changes in TSS chromatin was performed by unpaired t-test with Welch's correction. Comparison of expression for selected genes in samples with or without variable DREs was performed using the Mann-Whitney test. The significance of SNV and SNP enrichment in variable DREs was calculated by  $\chi^2$  test. The significance of variable DREs enrichment in conventional enhancer was calculated by Fisher's exact test.

## Supplemental References

Bailey, T.L., Boden, M., Buske, F.A., Frith, M., Grant, C.E., Clementi, L., Ren, J., Li, W.W., and Noble, W.S. (2009). MEME SUITE: tools for motif discovery and searching. *Nucleic Acids Res.* *37*, W202–8.

Bernstein, B.E., Birney, E., Dunham, I., Green, E.D., Gunter, C., and Snyder, M. (2012). An integrated encyclopedia of DNA elements in the human genome. *Nature* *489*, 57–74.

Dave, S.S., Wright, G., Tan, B., Rosenwald, A., Gascoyne, R.D., Chan, W.C., Fisher, R.I., Braziel, R.M., Rimsza, L.M., Grogan, T.M., et al. (2004). Prediction of survival in follicular lymphoma based on molecular features of tumor-infiltrating immune cells. *N. Engl. J. Med.* *351*, 2159–2169.

Feng, J., Liu, T., Qin, B., Zhang, Y., and Liu, X.S. (2012). Identifying ChIP-seq enrichment using MACS. *Nat. Protoc.* *7*, 1728–1740.

Fuchshofer, R., Yu, A.H.L., Welge-Lüssen, U., and Tamm, E.R. (2007). Bone morphogenetic protein-7 is an antagonist of transforming growth factor-beta2 in human trabecular meshwork cells. *Invest. Ophthalmol. Vis. Sci.* *48*, 715–726.

Giresi, P.G., and Lieb, J.D. (2009). Isolation of active regulatory elements from eukaryotic chromatin using FAIRE (Formaldehyde Assisted Isolation of Regulatory Elements). *Methods* *48*, 233–239.

Hansen, H.G., Schmidt, J.D., Søltoft, C.L., Ramming, T., Geertz-Hansen, H.M., Christensen, B., Sørensen, E.S., Juncker, A.S., Appenzeller-Herzog, C., and Ellgaard, L. (2012). Hyperactivity of the Ero1 $\alpha$  oxidase elicits endoplasmic reticulum stress but no broad antioxidant response. *J. Biol. Chem.* *287*, 39513–39523.

Hatem, A., Bozdağ, D., Toland, A.E., and Catalyürek, U. V (2013). Benchmarking short sequence mapping tools. *BMC Bioinformatics* *14*, 184.

Huang, D.W., Sherman, B.T., and Lempicki, R.A. (2009). Systematic and integrative analysis of large gene lists using DAVID bioinformatics resources. *Nat. Protoc.* *4*, 44–57.

Jolma, A., Yan, J., Whittington, T., Toivonen, J., Nitta, K.R., Rastas, P., Morgunova, E., Enge, M., Taipale, M., Wei, G., et al. (2013). DNA-binding specificities of human transcription factors. *Cell* *152*, 327–339.

Leich, E., Salaverria, I., Bea, S., Zettl, A., Wright, G., Moreno, V., Gascoyne, R.D., Chan, W.-C., Braziel, R.M., Rimsza, L.M., et al. (2009). Follicular lymphomas with and without translocation t(14;18) differ in gene expression profiles and genetic alterations. *Blood* *114*, 826–834.

- Leyva-Illades, D., Cherla, R.P., Galindo, C.L., Chopra, A.K., and Tesh, V.L. (2010). Global transcriptional response of macrophage-like THP-1 cells to Shiga toxin type 1. *Infect. Immun.* 78, 2454–2465.
- Liu, R., Jin, Y., Tang, W.H., Qin, L., Zhang, X., Tellides, G., Hwa, J., Yu, J., and Martin, K.A. (2013). Ten-eleven translocation-2 (TET2) is a master regulator of smooth muscle cell plasticity. *Circulation* 128, 2047–2057.
- Maurano, M.T., Humbert, R., Rynes, E., Thurman, R.E., Haugen, E., Wang, H., Reynolds, A.P., Sandstrom, R., Qu, H., Brody, J., et al. (2012). Systematic localization of common disease-associated variation in regulatory DNA. *Science* 337, 1190–1195.
- Neph, S., Vierstra, J., Stergachis, A.B., Reynolds, A.P., Haugen, E., Vernot, B., Thurman, R.E., John, S., Sandstrom, R., Johnson, A.K., et al. (2012). An expansive human regulatory lexicon encoded in transcription factor footprints. *Nature* 489, 83–90.
- Park, D.Y., Sakamoto, H., Kirley, S.D., Ogino, S., Kawasaki, T., Kwon, E., Mino-Kenudson, M., Lauwers, G.Y., Chung, D.C., Rueda, B.R., et al. (2007). The Cables gene on chromosome 18q is silenced by promoter hypermethylation and allelic loss in human colorectal cancer. *Am. J. Pathol.* 171, 1509–1519.
- Portales-Casamar, E., Thongjuea, S., Kwon, A.T., Arenillas, D., Zhao, X., Valen, E., Yusuf, D., Lenhard, B., Wasserman, W.W., and Sandelin, A. (2010). JASPAR 2010: the greatly expanded open-access database of transcription factor binding profiles. *Nucleic Acids Res.* 38, D105–10.
- Quinlan, A.R., and Hall, I.M. (2010). BEDTools: a flexible suite of utilities for comparing genomic features. *Bioinformatics* 26, 841–842.
- Reimand, J., Arak, T., and Vilo, J. (2011). g:Profiler--a web server for functional interpretation of gene lists (2011 update). *Nucleic Acids Res.* 39, W307–15.
- Subramanian, A., Tamayo, P., Mootha, V.K., Mukherjee, S., Ebert, B.L., Gillette, M.A., Paulovich, A., Pomeroy, S.L., Golub, T.R., Lander, E.S., et al. (2005). Gene set enrichment analysis: a knowledge-based approach for interpreting genome-wide expression profiles. *Proc. Natl. Acad. Sci. U. S. A.* 102, 15545–15550.
- Talby, L., Chambost, H., Roubaud, M.-C., N’Guyen, C., Milili, M., Loriod, B., Fossat, C., Picard, C., Gabert, J., Chiappetta, P., et al. (2006). The chemosensitivity to therapy of childhood early B acute lymphoblastic leukemia could be determined by the combined expression of CD34, SPI-B and BCR genes. *Leuk. Res.* 30, 665–676.
- Tempel, S. (2012). Using and understanding RepeatMasker. *Methods Mol. Biol.* 859, 29–51.
- Thomas-Chollier, M., Darbo, E., Herrmann, C., Defrance, M., Thieffry, D., and van Helden, J. (2012). A complete workflow for the analysis of full-size ChIP-seq (and similar) data sets using peak-motifs. *Nat. Protoc.* 7, 1551–1568.



Thurman, R.E., Rynes, E., Humbert, R., Vierstra, J., Maurano, M.T., Haugen, E., Sheffield, N.C., Stergachis, A.B., Wang, H., Vernot, B., et al. (2012). The accessible chromatin landscape of the human genome. *Nature* 489, 75–82.

Victora, G.D., Dominguez-Sola, D., Holmes, A.B., Deroubaix, S., Dalla-Favera, R., and Nussenzweig, M.C. (2012). Identification of human germinal center light and dark zone cells and their relationship to human B-cell lymphomas. *Blood* 120, 2240–2248.

Wang, V., Davis, D.A., Haque, M., Huang, L.E., and Yarchoan, R. (2005). Differential gene up-regulation by hypoxia-inducible factor-1alpha and hypoxia-inducible factor-2alpha in HEK293T cells. *Cancer Res.* 65, 3299–3306.

Weinberg, O.K., Ai, W.Z., Mariappan, M.R., Shum, C., Levy, R., and Arber, D.A. (2007). Minor BCL2 breakpoints in follicular lymphoma: frequency and correlation with grade and disease presentation in 236 cases. *J. Mol. Diagn.* 9, 530–537.
